# Supplementary material for: A Hyaluronan-binding Peptide (P15-1) Reduces Inflammatory and Catabolic Events in IL-1β-treated Human Articular Chondrocytes
Source: PubMed Central journal article supplement (PMC6989647; doi:10.1038/s41598-020-57586-7), 2020-01-29
Supplement: 41598_2020_57586_MOESM1_ESM.pdf [file 41598_2020_57586_MOESM1_ESM.pdf]

## Supplemental Material

### **A Hyaluronan-binding Peptide (P15-1) Reduces Inflammatory and Catabolic Events in IL-1 $\beta$ -treated Human Articular Chondrocytes**

Claire Shortt<sup>a,b</sup>, Leonard G. Luyt<sup>c,d</sup>, Eva A. Turley<sup>c,d</sup>, Mary K. Cowman<sup>a,e</sup>, and Thorsten Kirsch,<sup>a,e</sup>

<sup>a</sup>Musculoskeletal Research Center, Department of Orthopaedic Surgery, New York University School of Medicine, New York, NY, USA

<sup>b</sup>The University of Western Ontario, London, ON, Canada

<sup>c</sup>London Regional Cancer Program, Lawson Health Research Institute, London, ON, Canada

<sup>d</sup>Department of Biomedical Engineering, New York University Tandon School of Engineering, New York, NY, USA

<sup>b</sup>Current address: FoodMarble Digestive Health, Dublin 2, Ireland

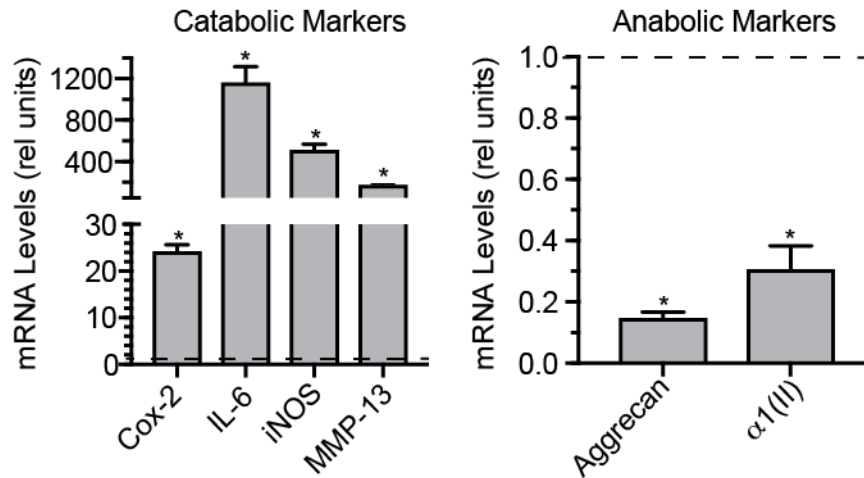

**Suppl. Figure 1:** mRNA levels of catabolic markers and anabolic markers in human articular chondrocytes cultured in the absence or presence of IL-1 $\beta$ . Human articular chondrocytes after reaching confluency were serum-starved for 24 h followed by treatment with IL-1 $\beta$  in PBS/0.1% BSA or PBS/0.1% BSA for 24 h. mRNA levels of catabolic markers (Cox-2, IL-6, iNOS, MMP-13), articular cartilage markers (aggrecan, type II collagen ( $\alpha 1(\text{II})$ )) were determined by real-time PCR using SYBR Green and normalized to the level of 18S RNA. The mRNA levels are expressed relative to the levels of vehicle-treated cells, which were set as 1 (dotted line). Data were obtained from triplicate PCRs using RNA from 3 different cultures. Values are the mean  $\pm$  SD. \* $p < 0.01$  vs. vehicle-treated cells.

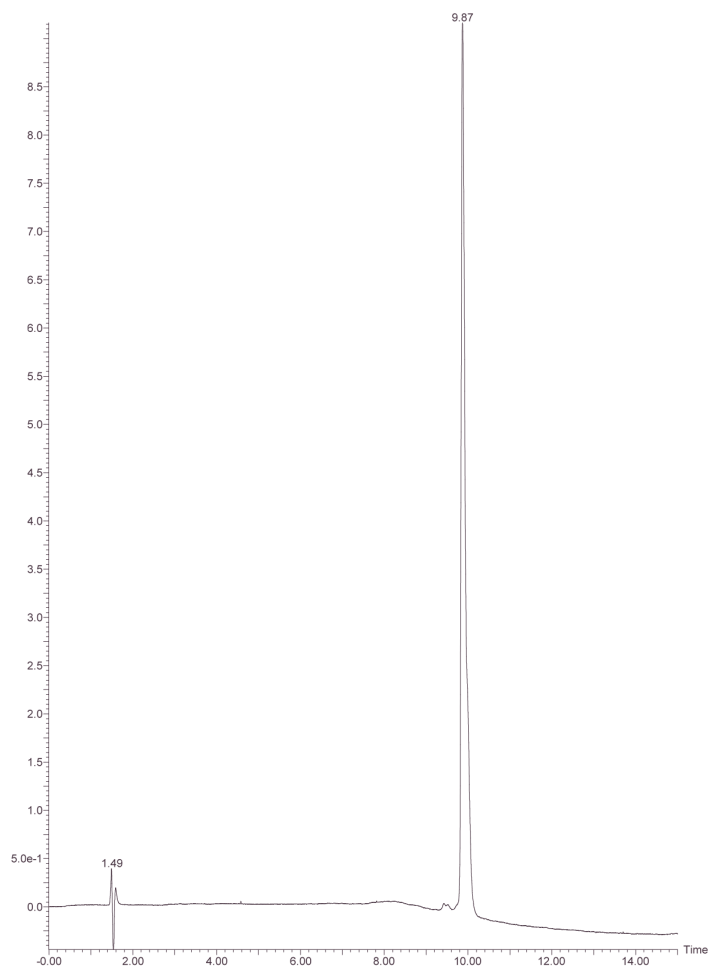

**Suppl. Figure 2:** UV Chromatogram of the P15-1 fraction analyzed by analytical Reversed-Phase High Performance Liquid Chromatography (RP-HPLC).

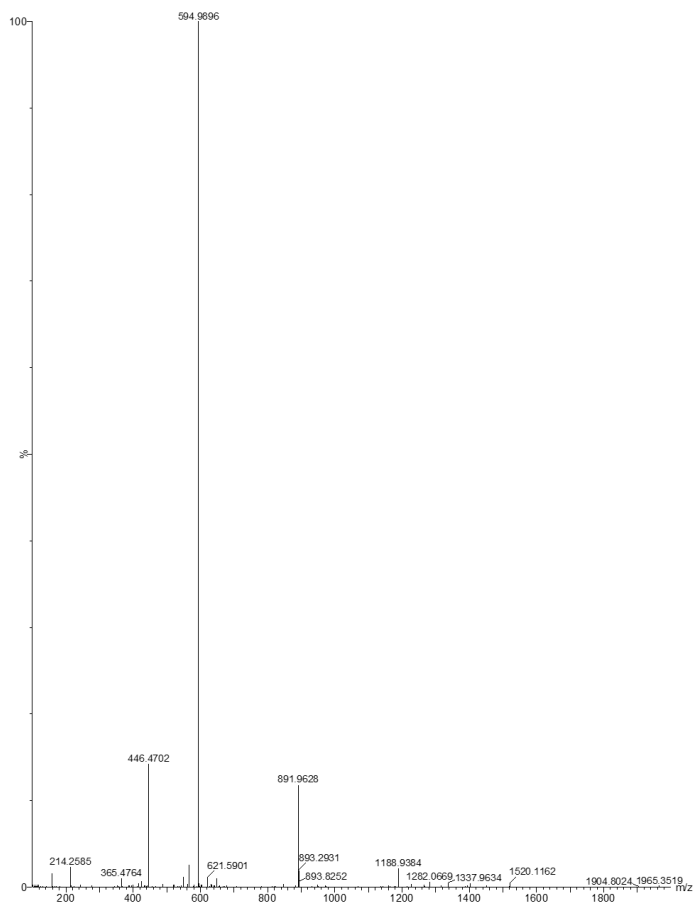

**Suppl. Figure 3:** MS Spectra of P15-1. Purity >95%. HRMS (ESI+): m/z calculated for  $C_{71}H_{120}N_{28}O_{22}S_2$ , Calculated  $[M+2H]^{+2} = 891.9378$ ; Found  $[M+2H]^{+2} = 891.9628$ , Calculated  $[M+3H]^{+3} = 594.6270$ ; Found  $[M+3H]^{+3} = 594.9896$ .

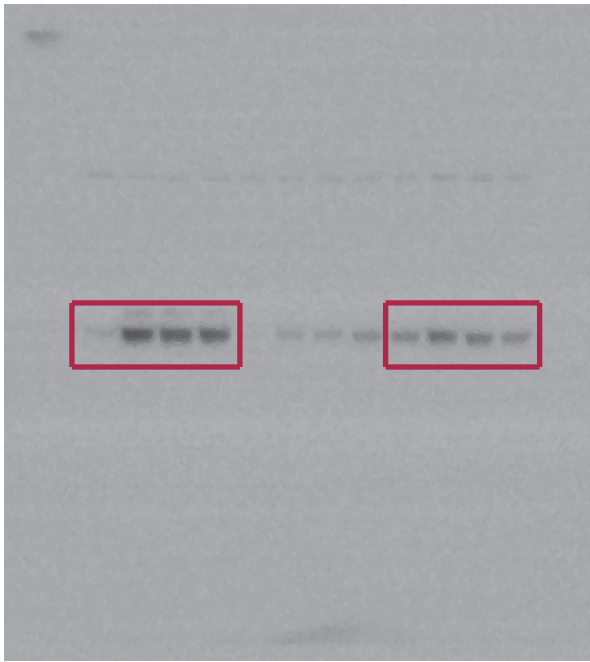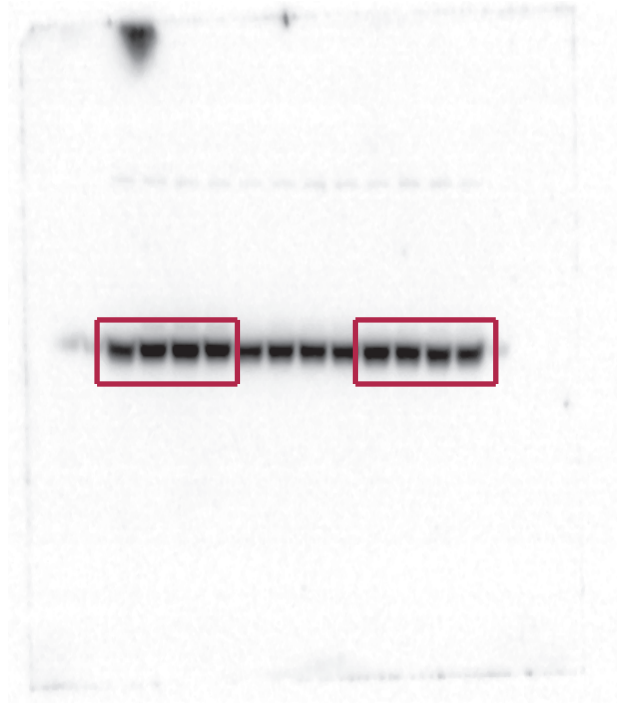

Supplementary Figure 4.

Full-lengths blots used to generate Figure 3A.
